# Supplementary material for: Micelle templated NiO hollow nanospheres as anode materials in lithium ion batteries
Source: Royal Society of Chemistry journal article supplement (doi:10.1039/c3ta14937d), 2014-01-01
Supplement: c3ta14937d1.pdf [file c3ta14937d1.pdf]

## Supporting Information

Micelles templated NiO hollow nanospheres as anode materials in lithium ion batteries

### Synthesis of PEO<sub>47</sub>-*b*-PAA<sub>90</sub>-*b*-PS<sub>80</sub> via RAFT-Controlled Radical Polymerization.

**Materials.** Poly(ethylene oxide) (PEO) based chain transfer agent (PEO<sub>47</sub>-CTA) was prepared as reported previously. 2,2'-Azobis(isobutyronitrile) (AIBN) was crystallized from methanol. Styrene was washed with an aqueous alkaline solution and distilled from calcium hydride under reduced pressure. Acrylic acid, *N,N*-dimethylformamide (DMF), and dioxane were dried over 4 Å molecular sieves and distilled under reduced pressure. Na<sub>2</sub>CO<sub>3</sub> (Wako), CaCl<sub>2</sub> (Katayama), tris buffer (Katayama), and naproxen sodium (Sigma-Aldrich) were used without further purification.

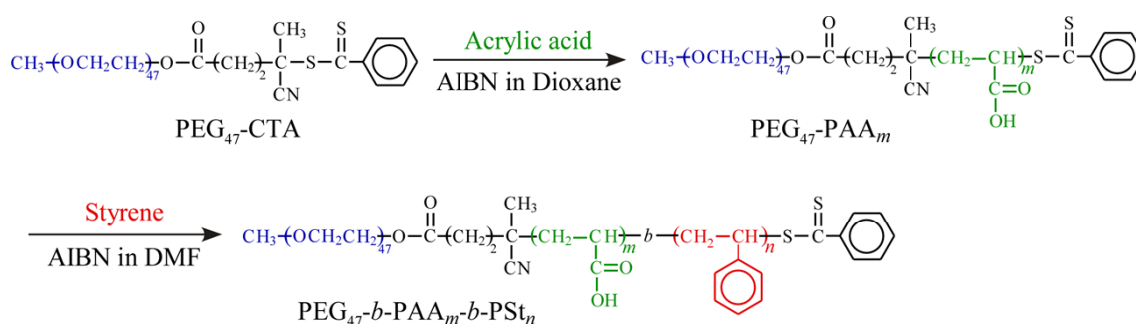

**Scheme S1.** Synthesis of PEG<sub>47</sub>-*b*-PAA<sub>*m*</sub>-*b*-PSt<sub>*n*</sub> via RAFT-controlled radical polymerization.

**Preparation of PEG<sub>47</sub>-*b*-PAA<sub>*m*</sub>.** Acrylic acid (2.18 g, 30.3 mmol), AIBN (12.5 mg, 0.08 mmol), and PEO<sub>47</sub>-CTA (475 mg, 0.20 mmol) were dissolved in dioxane (30 mL). The solution was degassed by purging with Ar gas for 30 min. Polymerization was carried out at 60 °C for 40 h. The polymerization mixture was dialyzed against pure water for one week. The diblock copolymer (PEO<sub>47</sub>-*b*-PAA<sub>90</sub>) was recovered by a freeze-drying technique (1.70 g, 64.0 %). Number average-degree of polymerization (DP) of PAA block was estimated from <sup>1</sup>H NMR spectrum in DMSO-*d*<sub>6</sub> to be 90. The number-average

molecular weight,  $M_n$ (NMR) for the block copolymer estimated from  $^1\text{H}$  NMR is  $8.85 \times 10^3$ .  $M_n$ (GPC) and molecular weight distribution ( $M_w/M_n$ ) were  $1.53 \times 10^4$  and 1.31, respectively.

**Preparation of PEO<sub>47</sub>-*b*-PAA<sub>90</sub>-*b*-PS<sub>80</sub>.** Styrene (10.4 mg, 10 mmol), AIBN (8.23 mg, 0.05 mmol), and PEO<sub>47</sub>-*b*-PAA<sub>90</sub> (1.11 g, 0.13 mmol) were dissolved in DMF (100 mL). The solution was degassed by purging with Ar gas for 30 min. The polymerization was carried out at 60 °C for 24 h. The polymerization mixture was dialyzed against acetone for 3 days and pure water for one day. The obtained triblock copolymer (PEO<sub>47</sub>-*b*-PAA<sub>90</sub>-*b*-PS<sub>80</sub>) was recovered by a freeze-drying technique (2.09 g, 18.2 %). DP of the PS block was 80 as estimated by  $^1\text{H}$  NMR in DMSO-*d*<sub>6</sub>.  $M_n$ (NMR) value for PEO<sub>47</sub>-*b*-PAA<sub>90</sub>-*b*-PS<sub>80</sub> is  $1.88 \times 10^4$ .  $M_n$ (GPC) and  $M_w/M_n$  were  $9.34 \times 10^3$  and 1.22, respectively.

**Measurements. Nuclear Magnetic Resonance (NMR).**  $^1\text{H}$  NMR spectra were obtained with a Bruker DRX-500 spectrometer operating at 500 MHz.

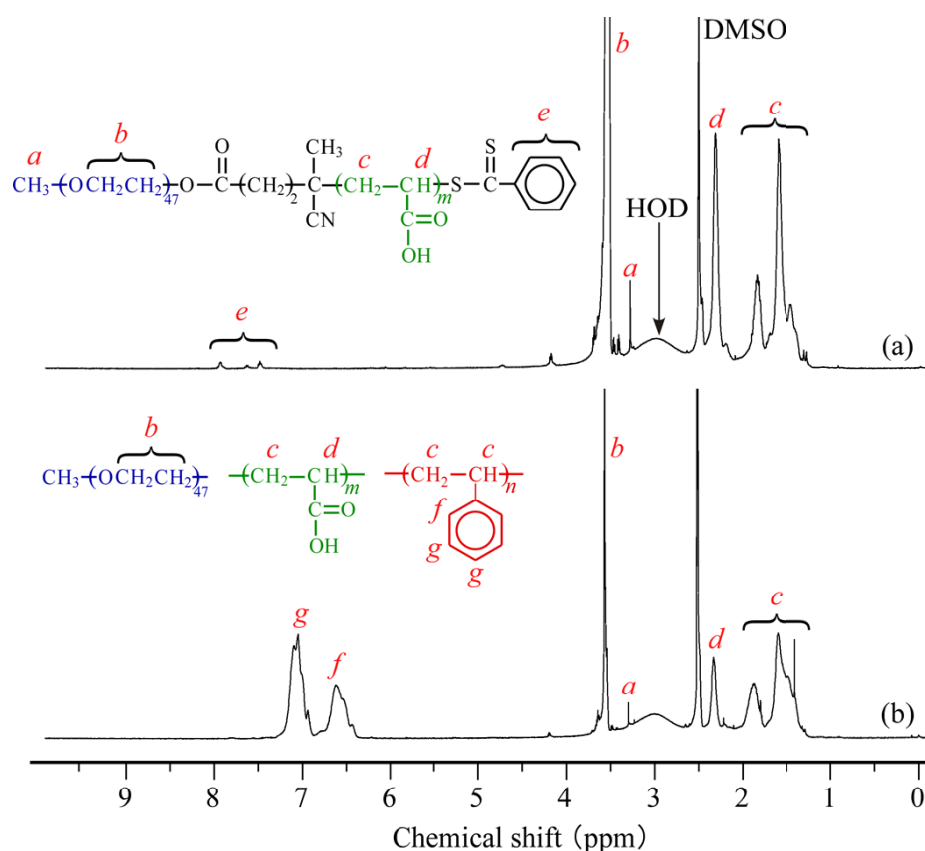

**Figure S2.** 500 MHz  $^1\text{H}$  NMR spectra of (a) PEG<sub>47</sub>-*b*-PAA<sub>90</sub> and (b) PEG<sub>47</sub>-*b*-PAA<sub>90</sub>-*b*-PSt<sub>80</sub> in DMSO-*d*<sub>6</sub> at 100 °C with the corresponding assignments.

**Gel-Permeation Chromatography (GPC).** GPC measurements of PEO<sub>47</sub>-*b*-PAA<sub>47</sub> were performed using a refractive index (RI) detector equipped with a Shodex GF-7M HQ column working at 40 °C under a flow rate of 0.6 mL/min. A phosphate buffer (pH 8) containing 10 vol % acetonitrile was used as eluent.  $M_n$  and  $M_w/M_n$  for PEO<sub>47</sub>-*b*-PAA<sub>47</sub> were calibrated with standard sodium poly(styrenesulfonate) samples. GPC measurements of PEO<sub>47</sub>-*b*-PAA<sub>90</sub>-*b*-PS<sub>80</sub> were performed at 40 °C with a Shodex DS-4 pump and an RI-101 refractive index detector using Shodex one KF-805L and three KF803L columns connected in series. THF was used as eluent at a flow rate of 1.0 mL/min.  $M_n$  and  $M_w/M_n$  were calibrated with standard polystyrene samples.

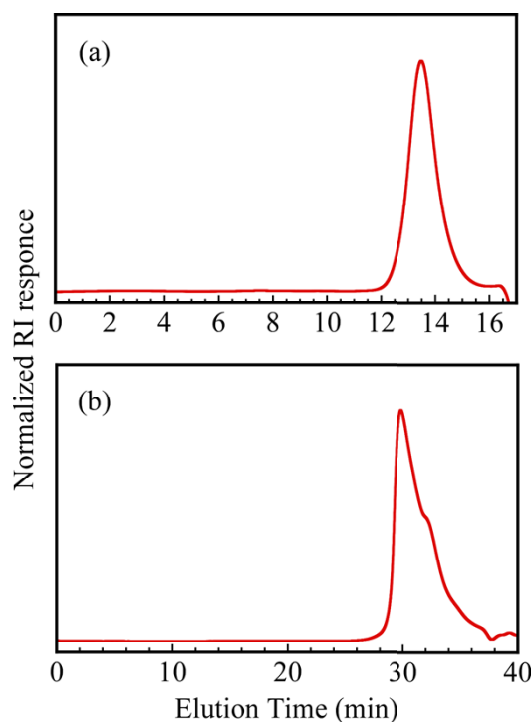

**Figure S3.** GPC elution profiles in (a) 50 mM phosphate buffer (pH 8) containing 10 vol % acetonitrile of PEG<sub>47</sub>-*b*-PAA<sub>90</sub> ( $M_n = 1.53 \times 10^4$  and  $M_w/M_n = 1.31$ ) and (b) THF of PEG<sub>47</sub>-*b*-PAA<sub>90</sub>-*b*-PSt<sub>80</sub> ( $M_n = 9.34 \times 10^3$  and  $M_w/M_n = 1.22$ ).

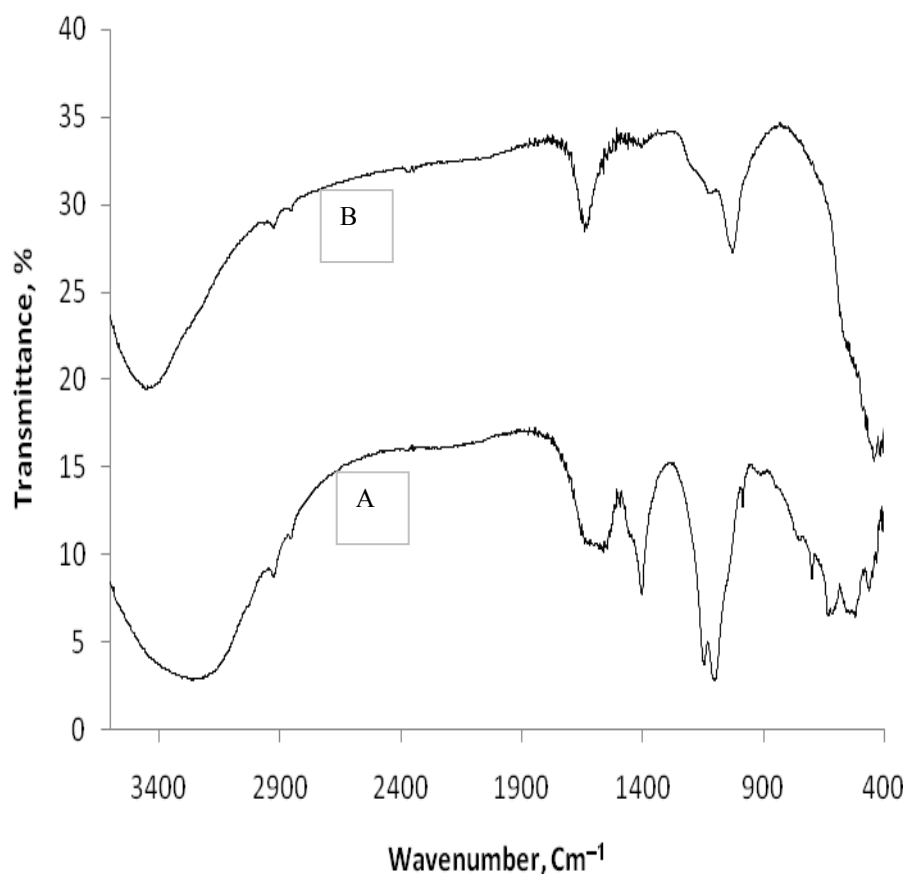

**Figure S4.** FTIR spectra of: (A) PS-PAA-PEO +  $\text{Ni}^{2+}$  composites, and (B) NiO hollow nanosphere.

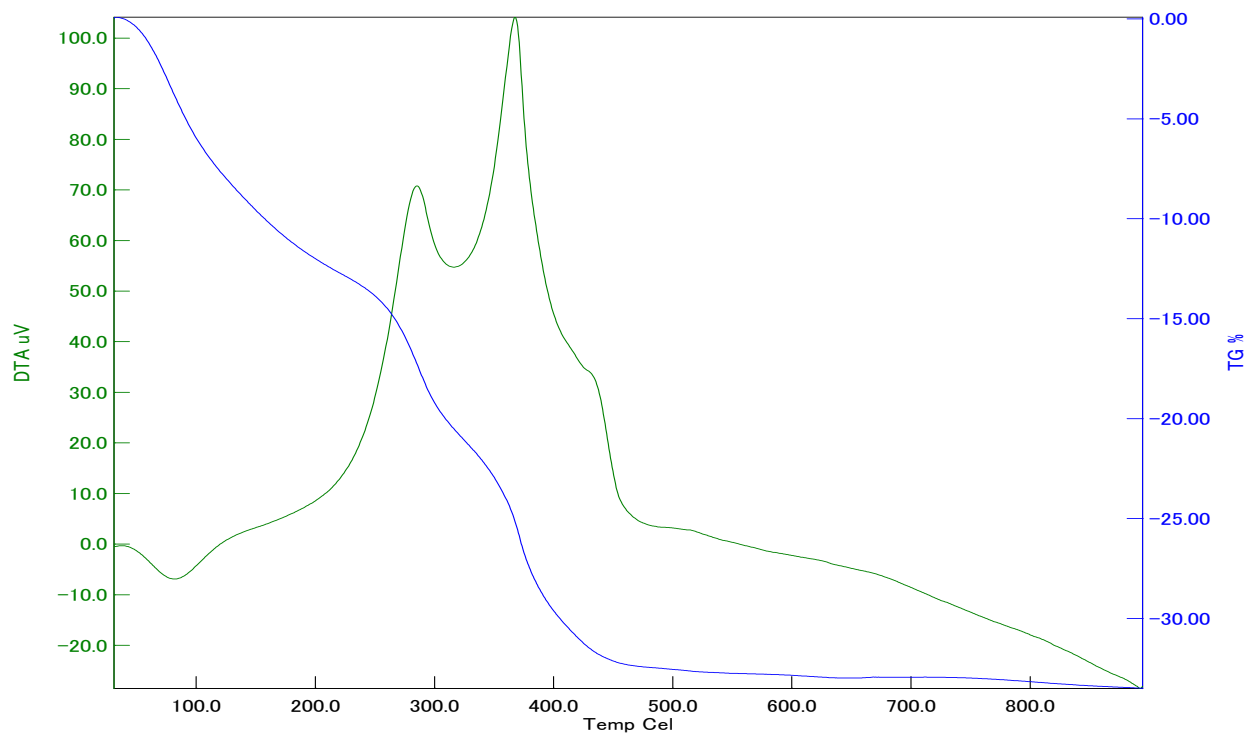

**Figure S5.** TG/DTA curves of PS-PAA-PEO/LaBO<sub>3</sub> composite particles.

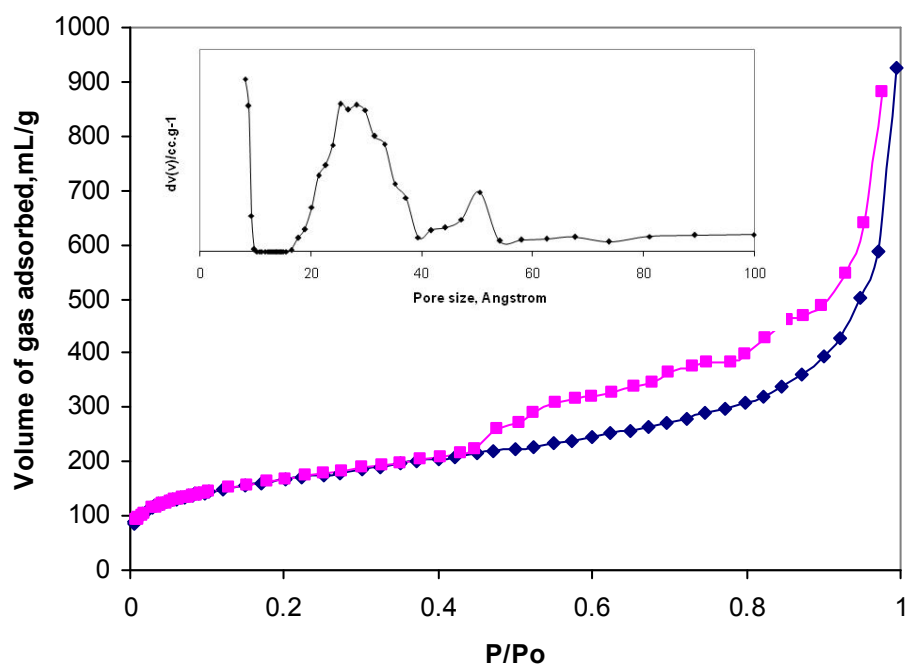

**Figure S6.** Nitrogen adsorption/desorption isotherms of NiO hollow nanospheres; Inset figure represents pore-size distribution curve.

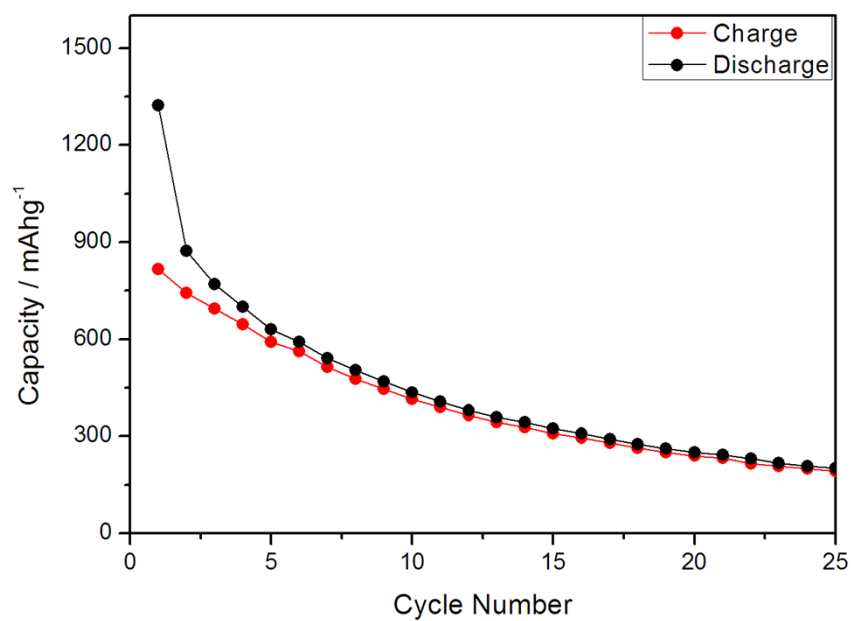

**Figure S7:** Cycling performance of NiO nanotubes for up to 25 cycles at a rate of 0.3 C in the voltage window of 0.005-3.0 V.

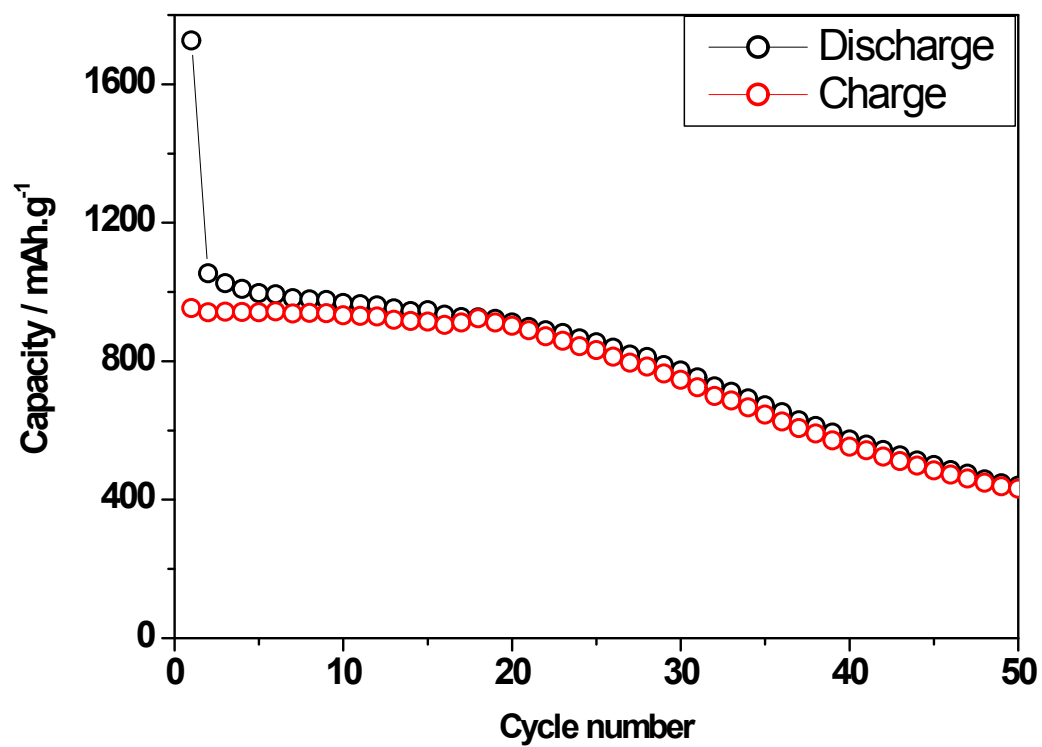

**Figure S8.** Rate performance of a composite containing NiO hollow particles and multiwalled carbon nanotubes (MWCNT) electrodes up to 50 cycles between 0.005 V and 3.0 V (vs. Li/Li<sup>+</sup>).



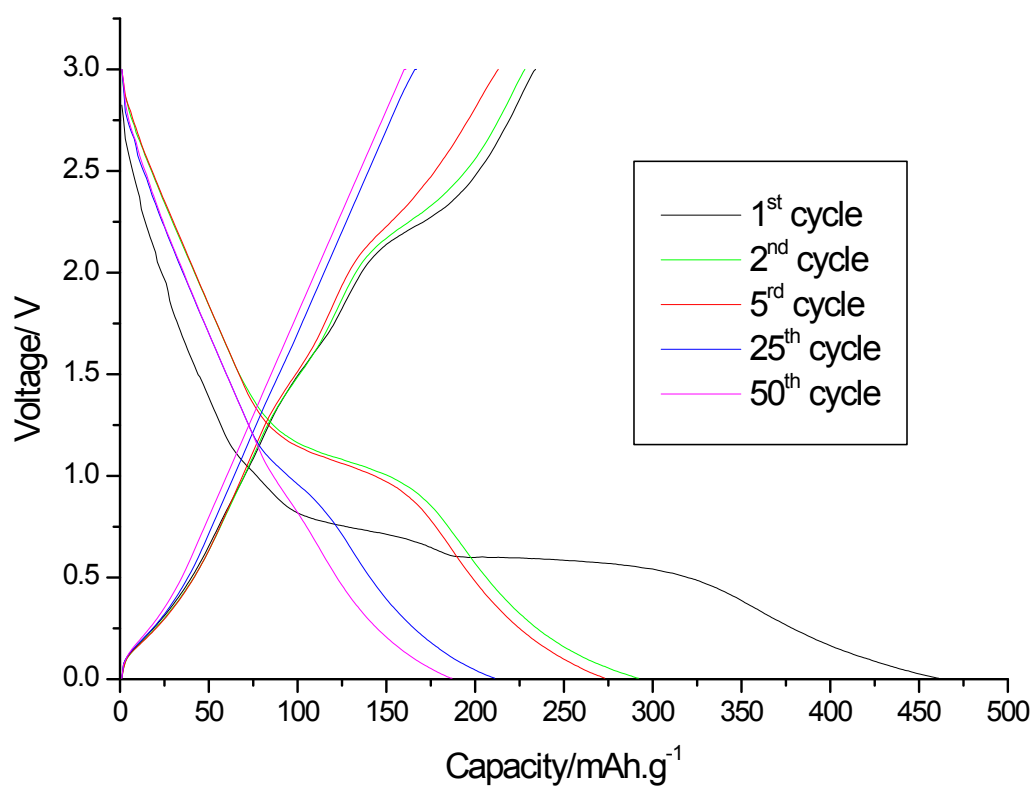

**Figure S9.** Galvanostatic charge/discharge curves of dense NiO particle electrodes between 0.005 V and 3.0 V (vs. Li/Li<sup>+</sup>).

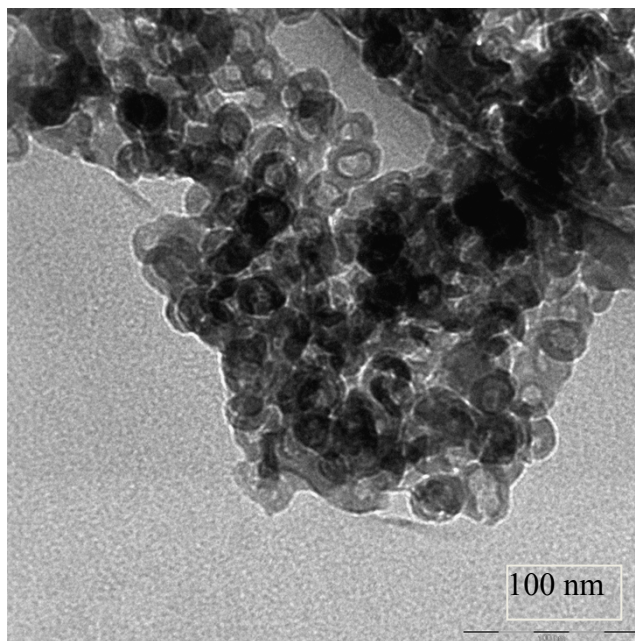

**Figure S10.** TEM image of NiO hollow particles collected from the coin-cell after electrochemical characterization.
